# Supplementary material for: Facile hydrothermal synthesis of porous MgCo2O4 nanoflakes as an electrode material for high-performance asymmetric supercapacitors
Source: Royal Society of Chemistry journal article supplement (doi:10.1039/d0na00353k), 2020-01-01
Supplement: d0na00353k1.pdf [file d0na00353k1.pdf]

## Supporting Information

### **Facile hydrothermal synthesis of porous MgCo<sub>2</sub>O<sub>4</sub> nanoflakes as electrode material for high-performance asymmetric supercapacitors**

Huiyu Chen, Xuming Du, Runze Wu, Ya Wang, Jiale Sun, Yanfei Zhang, Chunju Xu\*

School of Materials Science and Engineering, North University of China, Taiyuan 030051, China

\* Author to whom correspondence should be addressed.

E-mail: [chunju@nuc.edu.cn](mailto:chunju@nuc.edu.cn) (C. Xu)

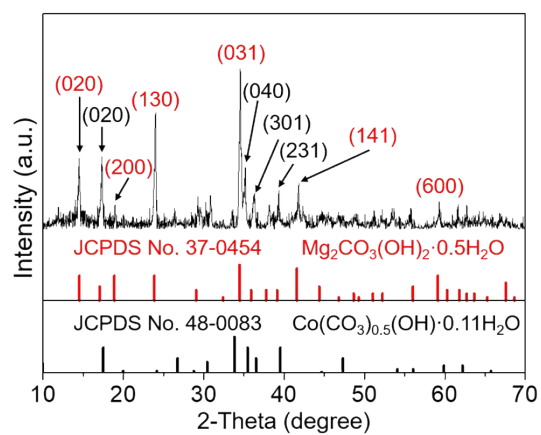

Fig. S1. The XRD pattern of the precipitate after hydrothermal reaction

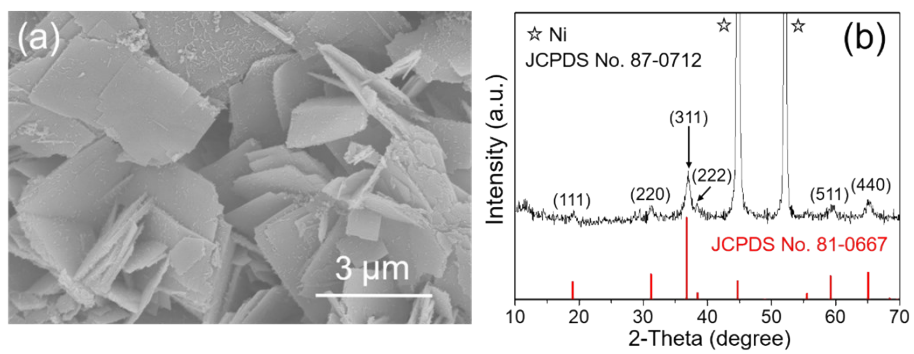

Fig. S2. (a) The SEM image and (b) XRD pattern of the MgCo<sub>2</sub>O<sub>4</sub> NFs after 5000 continuous GCD test

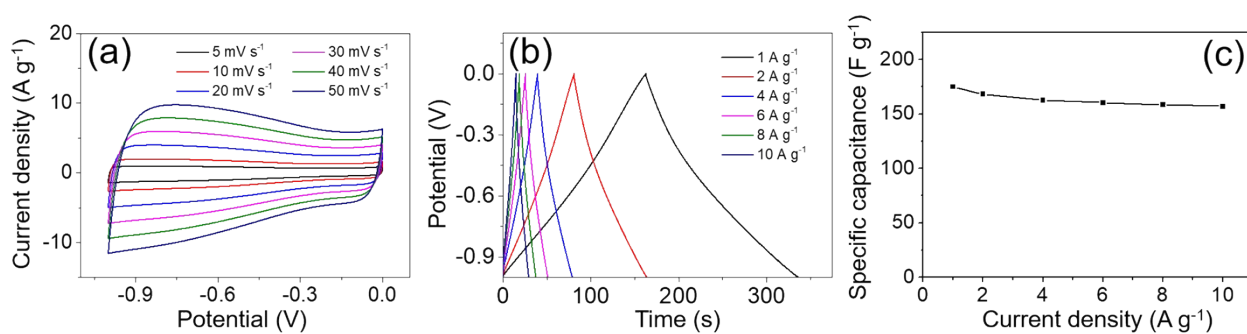

Fig. S3. Electrochemical tests of the AC electrode in 2 M of KOH solution: (a) CV curves obtained at scan rate from 5 to 50  $\text{mV s}^{-1}$ , (b) GCD curves measured at different current density from 1 to 10  $\text{A g}^{-1}$ , and (c) specific capacitance at different current density.
